# Supplementary material for: Programmatic Management of Drug-Resistant Tuberculosis: An Updated Research Agenda
Source: PLOS journal article supplement (doi:10.1371/journal.pone.0155968), 2016-05-25

**S2, Appendix: Subcategories - Mean of Priority Ranking Assigned by Participants (N=66),  
1 representing the highest priority and 6 representing the lowest priority**

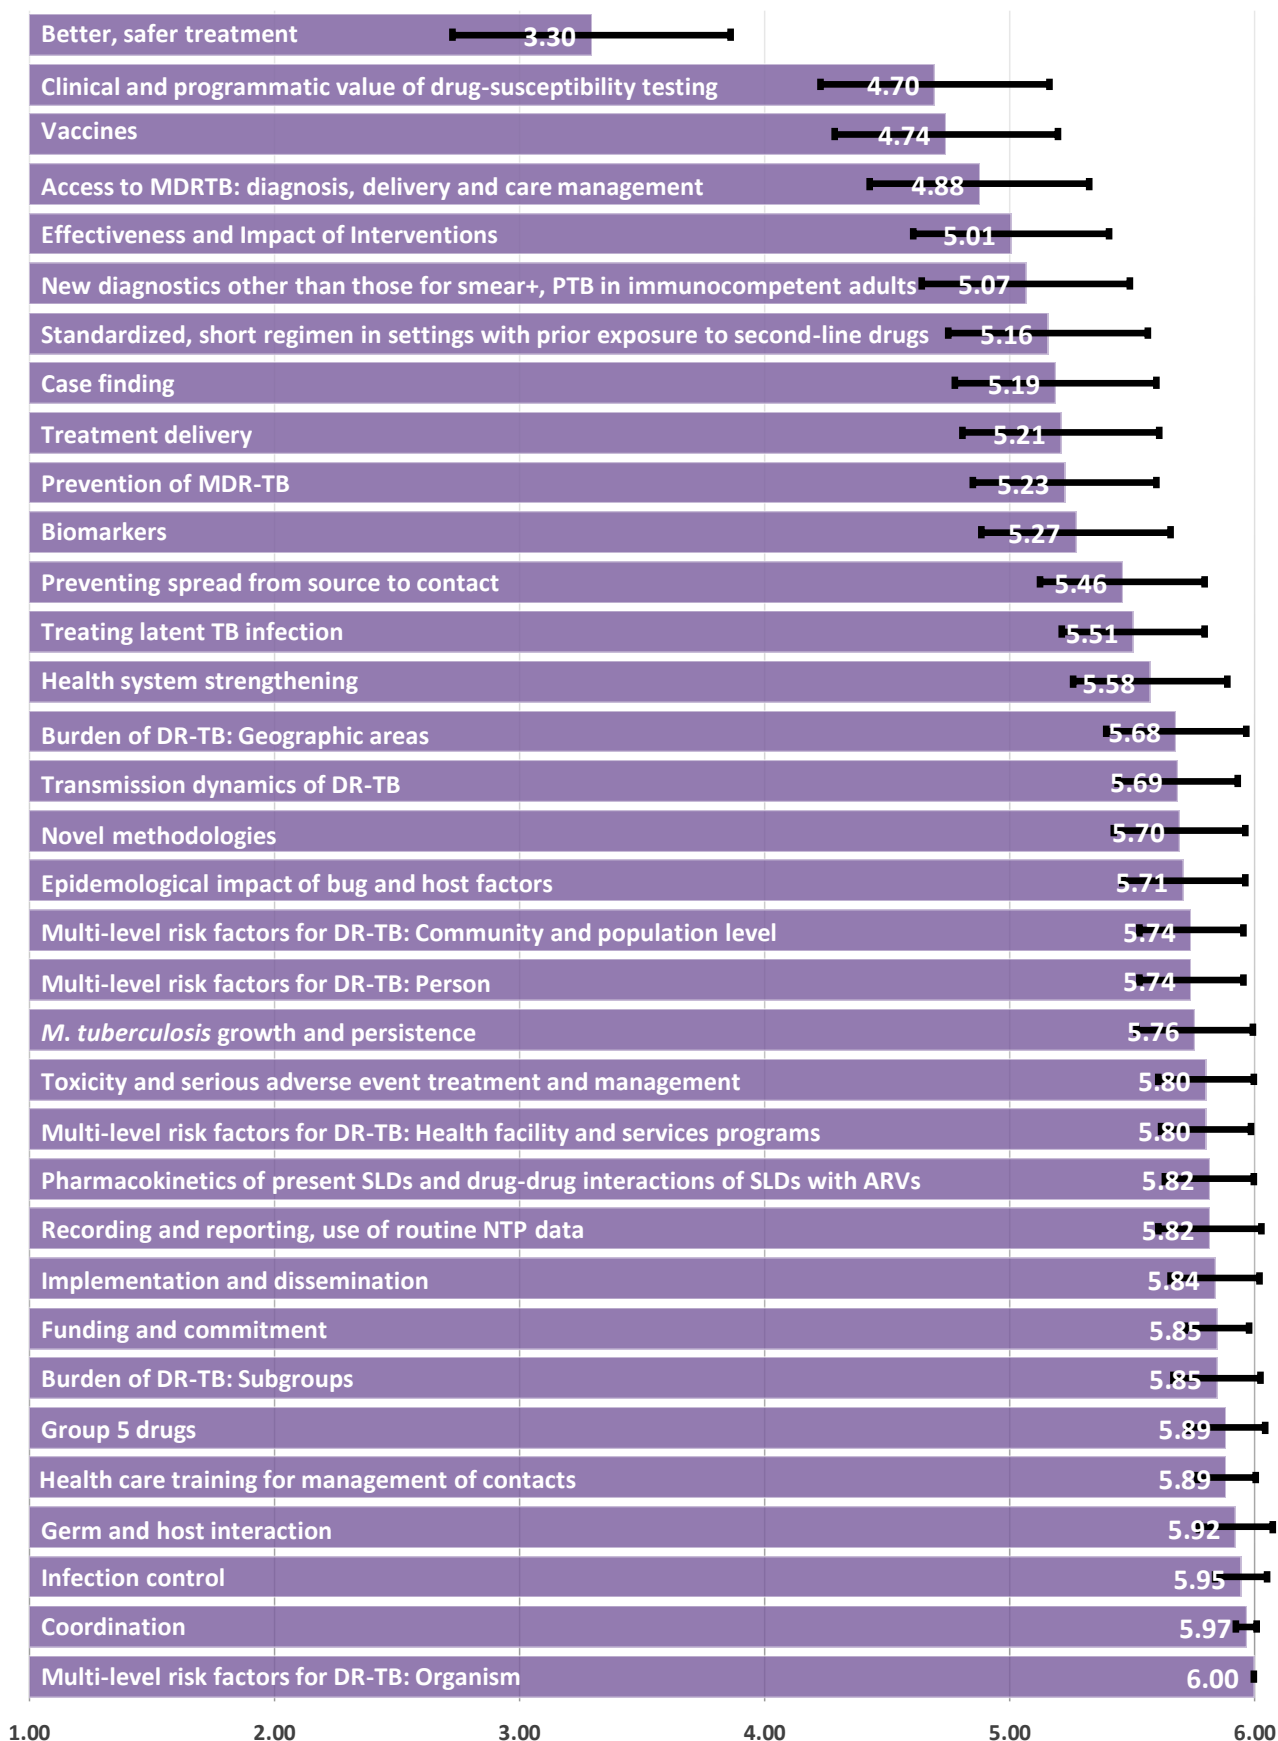

Supplement: S2 (10.1371/journal.pone.0155968.s002) [file journal.pone.0155968.s002]
