# Supplementary material for: Programmatic Management of Drug-Resistant Tuberculosis: An Updated Research Agenda
Source: PLoS One. 2016 May 25;11(5):e0155968. doi: 10.1371/journal.pone.0155968 (PMC4880345; doi:10.1371/journal.pone.0155968)
Supplement: S3 Appendix — (XLSX) [file pone.0155968.s003.xlsx]

## Sheet: Data Dictionary
	CR Assigned Variable	Survey Assigned Variable	Survey Question
Info	ID	ResponseID
	COMPLETED	V10/Finished
Laboratory Support Selection	LS_S_1	Q1_1	Please select your top FIVE (5) research questions from the list below:-What is the performance of new diagnostic tests, compared to gold standards, across programmatic settings?
	LS_S_2	Q1_2	Please select your top FIVE (5) research questions from the list below:-Do results of new diagnostic tests improve patient-relevant outcomes OR treatment outcomes?
	LS_S_3	Q1_3	Please select your top FIVE (5) research questions from the list below:-What is the impact of new diagnostic tests on public health and programs?
	LS_S_4	Q1_4	Please select your top FIVE (5) research questions from the list below:-How can we reliably identify forms of tuberculosis that are not easily diagnosed by examination of sputum sample (e.g., meningitis, pediatric TB, TB in HIV-coinfected persons)?
	LS_S_5	Q1_5	Please select your top FIVE (5) research questions from the list below:-How can current methods be improved or better interpreted to enhance clinical management of patients (whose TB is caused by a bacterial population) with the following characteristics: (1)low level INH resistance; (2) discordant RIF results between tests; (3) resistance results for only a subset of fluoroquinolones, rifamycins…
	LS_S_6	Q1_6	Please select your top FIVE (5) research questions from the list below:-What is the correlation of individual mutations with phenotypic drug susceptibility and with the clinical outcomes of these isolates?
	LS_S_7	Q1_7	Please select your top FIVE (5) research questions from the list below:-How can we develop new rapid tests that are correlated to specific mutations and patient outcomes for second line drug susceptibility?
	LS_S_8	Q1_8	Please select your top FIVE (5) research questions from the list below:-What factors allow MTB strains to efficiently cause transmission and increase virulence?
	LS_S_9	Q1_9	Please select your top FIVE (5) research questions from the list below:-How can we improve the understanding of host factors that contribute to the development of drug resistance, e.g. key molecular features of host/pathogen interactions including immune system characteristics that differentiate latent vs. active disease and those that enhance host susceptibility and progression to active disease?
	LS_S_10	Q1_10	Please select your top FIVE (5) research questions from the list below:-How can we develop better biomarkers, including non-bacteriological markers, to accelerate new TB drug/regimen research and development and improve clinical and programmatic ability to assess treatment response?
Laboratory Support Ranking	LS_R_1	Q3_x1	Laboratory Support / If you would like to rank some or all of these research questions, please select...-What is the performance of new diagnostic tests, compared to gold standards, across programmatic settings?
	LS_R_2	Q3_x2	Laboratory Support / If you would like to rank some or all of these research questions, please select...-Do results of new diagnostic tests improve patient-relevant outcomes OR treatment outcomes?
	LS_R_3	Q3_x3	Laboratory Support / If you would like to rank some or all of these research questions, please select...-What is the impact of new diagnostic tests on public health and programs?
	LS_R_4	Q3_x4	Laboratory Support / If you would like to rank some or all of these research questions, please select...-How can we reliably identify forms of tuberculosis that are not easily diagnosed by examination of sputum sample (e.g., meningitis, pediatric TB, TB in HIV-coinfected persons)?
	LS_R_5	Q3_x5	Laboratory Support / If you would like to rank some or all of these research questions, please select...-How can current methods be improved or better interpreted to enhance clinical management of patients (whose TB is caused by a bacterial population) with the following characteristics: (1)low level INH resistance; (2) discordant RIF results between tests; (3) resistance results for only a subse…
	LS_R_6	Q3_x6	Laboratory Support / If you would like to rank some or all of these research questions, please select...-What is the correlation of individual mutations with phenotypic drug susceptibility and with the clinical outcomes of these isolates?
	LS_R_7	Q3_x7	Laboratory Support / If you would like to rank some or all of these research questions, please select...-How can we develop new rapid tests that are correlated to specific mutations and patient outcomes for second line drug susceptibility?
	LS_R_8	Q3_x8	Laboratory Support / If you would like to rank some or all of these research questions, please select...-What factors allow MTB strains to efficiently cause transmission and increase virulence?
	LS_R_9	Q3_x9	Laboratory Support / If you would like to rank some or all of these research questions, please select...-How can we improve the understanding of host factors that contribute to the development of drug resistance, e.g. key molecular features of host/pathogen interactions including immune system characteristics that differentiate latent vs. active disease and those that enhance host susceptibility …
	LS_R_10	Q3_x10	Laboratory Support / If you would like to rank some or all of these research questions, please select...-How can we develop better biomarkers, including non-bacteriological markers, to accelerate new TB drug/regimen research and development and improve clinical and programmatic ability to assess treatment response?
Treatment Strategy Selection	TS_S_1	Q8_1	Please select your top FIVE (5) research questions from the list below:-How do we efficiently develop more effective, shorter and safer M/XDR-TB treatment regimens that may be used for special populations (e.g., pregnant/lactating women, children, HIV-coinfected individuals)?
	TS_S_2	Q8_2	Please select your top FIVE (5) research questions from the list below:-What are the precise pharmacological characteristics, efficacies and toxicities and interactions of group 5 drugs both in MDR- and XDR-TB treatment combinations?
	TS_S_3	Q8_3	Please select your top FIVE (5) research questions from the list below:-Is the 9 month "Bangladesh" MDR-TB treatment regimen effective in countries with high prevalence of resistance to second-line drugs (SLDs)? What modifications would be necessary?
	TS_S_4	Q8_4	Please select your top FIVE (5) research questions from the list below:-How do we prevent toxicity from SLDs and optimally mitigate serious adverse events (SAEs) in DR- and XDR-TB treatment regimens? (especially in special populations e.g., pregnant/lactating women, children, HIV-coinfected individuals)
	TS_S_5	Q8_5	Please select your top FIVE (5) research questions from the list below:-How does pathogen and host interaction affect management of DR-TB?
	TS_S_6	Q8_6	Please select your top FIVE (5) research questions from the list below:-How can we optimize the use of SLD combinations, and SLD with antiretrovial therapy, through evidence accumulated in drug-drug interactions and other pharmacokinetic studies?
	TS_S_7	Q8_7	Please select your top FIVE (5) research questions from the list below:-What are the optimal combinations and duration of treatment to prevent the emergence of anti-TB drug resistance?
Treatment Straegy Ranking	TS_R_1	Q9_x1	Treatment Strategy / / ¬† / If you would like to rank some or all of these research questions, please sele...-How do we efficiently develop more effective, shorter and safer M/XDR-TB treatment regimens that may be used for special populations (e.g., pregnant/lactating women, children, HIV-coinfected individuals)?
	TS_R_2	Q9_x2	Treatment Strategy / / ¬† / If you would like to rank some or all of these research questions, please sele...-What are the precise pharmacological characteristics, efficacies and toxicities and interactions of group 5 drugs both in MDR- and XDR-TB treatment combinations?
	TS_R_3	Q9_x3	Treatment Strategy / / ¬† / If you would like to rank some or all of these research questions, please sele...-Is the 9 month "Bangladesh" MDR-TB treatment regimen effective in countries with high prevalence of resistance to second-line drugs (SLDs)? What modifications would be necessary?
	TS_R_4	Q9_x4	Treatment Strategy / / ¬† / If you would like to rank some or all of these research questions, please sele...-How do we prevent toxicity from SLDs and optimally mitigate serious adverse events (SAEs) in DR- and XDR-TB treatment regimens? (especially in special populations e.g., pregnant/lactating women, children, HIV-coinfected individuals)
	TS_R_5	Q9_x5	Treatment Strategy / / ¬† / If you would like to rank some or all of these research questions, please sele...-How does pathogen and host interaction affect management of DR-TB?
	TS_R_6	Q9_x6	Treatment Strategy / / ¬† / If you would like to rank some or all of these research questions, please sele...-How can we optimize the use of SLD combinations, and SLD with antiretrovial therapy, through evidence accumulated in drug-drug interactions and other pharmacokinetic studies?
	TS_R_7	Q9_x7	Treatment Strategy / / ¬† / If you would like to rank some or all of these research questions, please sele...-What are the optimal combinations and duration of treatment to prevent the emergence of anti-TB drug resistance?
Programmatically Relevant Research Selection	PRR_S_1	Q11_1	Please select your top FIVE (5) research questions from the list below:-Which groups of patients with increased proportion of MDR-TB should be targeted for DST in the context of limited resources and which diagnostic algorithms should be used to identify patients within risk groups?
	PRR_S_2	Q11_2	Please select your top FIVE (5) research questions from the list below:-What are options for short-course treatment and how can it be used to expand MDR-TB treatment?
	PRR_S_3	Q11_3	Please select your top FIVE (5) research questions from the list below:-What are barriers to treatment initiation and completion?
	PRR_S_4	Q11_4	Please select your top FIVE (5) research questions from the list below:-What infection control measures exist with proven evidence to reduce transmission?
	PRR_S_5	Q11_5	Please select your top FIVE (5) research questions from the list below:-What current tests are available to assess potential for transmission?
	PRR_S_6	Q11_6	Please select your top FIVE (5) research questions from the list below:-How do gaps in infection control vary across settings?
	PRR_S_7	Q11_7	Please select your top FIVE (5) research questions from the list below:-What is the quality of routinely captured data, including on the programmatic management of drug resistant tuberculosis (PMDRTB), and what interventions are required to improve data capture & quality?
	PRR_S_8	Q11_8	Please select your top FIVE (5) research questions from the list below:-How can data be used more actively to identify barriers to PMDRTB scale up and to identify topics for operational research?
	PRR_S_9	Q11_9	Please select your top FIVE (5) research questions from the list below:-How do we study key barriers to delivery of services for TB and DR-TB diagnosis and treatment initiation?
	PRR_S_10	Q11_10	Please select your top FIVE (5) research questions from the list below:-How do new interventions and technologies become adapted and integrated into NTPs?
	PRR_S_11	Q11_11	Please select your top FIVE (5) research questions from the list below:-What is the impact of new interventions and technology on case-finding and treatment initiation?
	PRR_S_12	Q11_12	Please select your top FIVE (5) research questions from the list below:-What is relative contribution of public- and private-sector providers? How can use of new tools be integrated, correctly and effectively in private sector, to enhance contribution to TB control?
	PRR_S_13	Q11_13	Please select your top FIVE (5) research questions from the list below:-What resources are needed to ensure equitable access to care?
	PRR_S_14	Q11_14	Please select your top FIVE (5) research questions from the list below:-What commitments are necessary from donors and how can they be held accountable?
	PRR_S_15	Q11_15	Please select your top FIVE (5) research questions from the list below:-(How) do rapid molecular test affect treatment outcome and long-term endpoints?
	PRR_S_16	Q11_16	Please select your top FIVE (5) research questions from the list below:-What strategies support integration of TB control activities into health care systems?
	PRR_S_17	Q11_17	Please select your top FIVE (5) research questions from the list below:-How do we integrate (and modify) social determinants to improve TB control?
	PRR_S_18	Q11_18	Please select your top FIVE (5) research questions from the list below:-Operationally, what are the best methods to ensure optimal treatment, including guidelines; reliable drug supply; staff appropriately trained; adequate health facilities?
Programmatical Relevant Research Ranking	PRR_R_1	Q12_x1	Programmatically Relevant Research / / ¬† / If you would like to rank some or all of these research questi...-Which groups of patients with increased proportion of MDR-TB should be targeted for DST in the context of limited resources and which diagnostic algorithms should be used to identify patients within risk groups?
	PRR_R_2	Q12_x2	Programmatically Relevant Research / / ¬† / If you would like to rank some or all of these research questi...-What are options for short-course treatment and how can it be used to expand MDR-TB treatment?
	PRR_R_3	Q12_x3	Programmatically Relevant Research / / ¬† / If you would like to rank some or all of these research questi...-What are barriers to treatment initiation and completion?
	PRR_R_4	Q12_x4	Programmatically Relevant Research / / ¬† / If you would like to rank some or all of these research questi...-What infection control measures exist with proven evidence to reduce transmission?
	PRR_R_5	Q12_x5	Programmatically Relevant Research / / ¬† / If you would like to rank some or all of these research questi...-What current tests are available to assess potential for transmission?
	PRR_R_6	Q12_x6	Programmatically Relevant Research / / ¬† / If you would like to rank some or all of these research questi...-How do gaps in infection control vary across settings?
	PRR_R_7	Q12_x7	Programmatically Relevant Research / / ¬† / If you would like to rank some or all of these research questi...-What is the quality of routinely captured data, including on the programmatic management of drug resistant tuberculosis (PMDRTB), and what interventions are required to improve data capture & quality?
	PRR_R_8	Q12_x8	Programmatically Relevant Research / / ¬† / If you would like to rank some or all of these research questi...-How can data be used more actively to identify barriers to PMDRTB scale up and to identify topics for operational research?
	PRR_R_9	Q12_x9	Programmatically Relevant Research / / ¬† / If you would like to rank some or all of these research questi...-How do we study key barriers to delivery of services for TB and DR-TB diagnosis and treatment initiation?
	PRR_R_10	Q12_x10	Programmatically Relevant Research / / ¬† / If you would like to rank some or all of these research questi...-How do new interventions and technologies become adapted and integrated into NTPs?
	PRR_R_11	Q12_x11	Programmatically Relevant Research / / ¬† / If you would like to rank some or all of these research questi...-What is the impact of new interventions and technology on case-finding and treatment initiation?
	PRR_R_12	Q12_x12	Programmatically Relevant Research / / ¬† / If you would like to rank some or all of these research questi...-What is relative contribution of public- and private-sector providers? How can use of new tools be integrated, correctly and effectively in private sector, to enhance contribution to TB control?
	PRR_R_13	Q12_x13	Programmatically Relevant Research / / ¬† / If you would like to rank some or all of these research questi...-What resources are needed to ensure equitable access to care?
	PRR_R_14	Q12_x14	Programmatically Relevant Research / / ¬† / If you would like to rank some or all of these research questi...-What commitments are necessary from donors and how can they be held accountable?
	PRR_R_15	Q12_x15	Programmatically Relevant Research / / ¬† / If you would like to rank some or all of these research questi...-(How) do rapid molecular test affect treatment outcome and long-term endpoints?
	PRR_R_16	Q12_x16	Programmatically Relevant Research / / ¬† / If you would like to rank some or all of these research questi...-What strategies support integration of TB control activities into health care systems?
	PRR_R_17	Q12_x17	Programmatically Relevant Research / / ¬† / If you would like to rank some or all of these research questi...-How do we integrate (and modify) social determinants to improve TB control?
	PRR_R_18	Q12_x18	Programmatically Relevant Research / / ¬† / If you would like to rank some or all of these research questi...-Operationally, what are the best methods to ensure optimal treatment, including guidelines; reliable drug supply; staff appropriately trained; adequate health facilities?
Epidemiology Selection	E_S_1_	Q15_1	Please select your top FIVE (5) research questions from the list below:-In countries without current, representative data on the burden of drug-resistant TB, what is the burden? (How) can non-representative data be used to improve estimates of DR-TB?
	E_S_2	Q15_2	Please select your top FIVE (5) research questions from the list below:-What is the frequency of resistance to PZA, moxifloxacin, and injectables?
	E_S_3	Q15_3	Please select your top FIVE (5) research questions from the list below:-What is the variability of drug resistance within countries or regions?
	E_S_4	Q15_4	Please select your top FIVE (5) research questions from the list below:-What is the frequency of MDR-TB, XDR-TB, resistance to PZA, and moxifloxacin among important subgroups: children, migrants/internally displaced persons, people living with HIV?
	E_S_5	Q15_5	Please select your top FIVE (5) research questions from the list below:-Do other components of fitness vary by genotype, strain? Does transmission frequency vary by strain & genotype, and is this variation modified by resistance? Does such strain-dependent transmissibility vary by setting, i.e., hospitals, prisons, mines?
	E_S_6	Q15_6	Please select your top FIVE (5) research questions from the list below:-What are the consequences for the probability of transmission of multiple infections with different strains different types of drug resistance within a single host?
	E_S_7	Q15_7	Please select your top FIVE (5) research questions from the list below:-Do strain/genotype predict incidence? Drug resistance acquisition/amplification? Transmission? And outcomes?
	E_S_8	Q15_8	Please select your top FIVE (5) research questions from the list below:-Do different resistance patterns (mono, combinations) predict incidence? Drug resistance acquisition/amplification? Transmission? And outcomes?
	E_S_9	Q15_9	Please select your top FIVE (5) research questions from the list below:-Do individual-level demographic, behavioral, clinical characteristics predict incidence? Drug resistance acquisition/amplification? Transmission? And outcomes?
	E_S_10	Q15_10	Please select your top FIVE (5) research questions from the list below:-Do different health-facility characteristics (e.g., access, quality of care, supervision, support) predict incidence? Drug resistance acquisition/amplification? Transmission? And outcomes?
	E_S_11	Q15_11	Please select your top FIVE (5) research questions from the list below:-Does source of transmission (i.e., nosocomia) predict incidence? Drug resistance acquisition/amplification? Transmission? And outcomes?
	E_S_12	Q15_12	Please select your top FIVE (5) research questions from the list below:-What ecologic or population-level characteristics predict resistance incidence, acquisition and/or amplification, transmission, outcomes: regimens; population burden of other diseases (e.g., HIV); degree of public-private mix in TB control; geography or socio-economic status?
	E_S_13	Q15_13	Please select your top FIVE (5) research questions from the list below:-What interventions (e.g., household contact tracing; early, routine DST for all TB cases) are effective at reducing nosocomial infection? What is the impact of these interventions?
Epidemiology Ranking	E_R_1	Q16_x1	Epidemiology / / ¬† / If you would like to rank some or all of these research questions, please select a r...-In countries without current, representative data on the burden of drug-resistant TB, what is the burden? (How) can non-representative data be used to improve estimates of DR-TB?
	E_R_2	Q16_x2	Epidemiology / / ¬† / If you would like to rank some or all of these research questions, please select a r...-What is the frequency of resistance to PZA, moxifloxacin, and injectables?
	E_R_3	Q16_x3	Epidemiology / / ¬† / If you would like to rank some or all of these research questions, please select a r...-What is the variability of drug resistance within countries or regions?
	E_R_4	Q16_x4	Epidemiology / / ¬† / If you would like to rank some or all of these research questions, please select a r...-What is the frequency of MDR-TB, XDR-TB, resistance to PZA, and moxifloxacin among important subgroups: children, migrants/internally displaced persons, people living with HIV?
	E_R_5	Q16_x5	Epidemiology / / ¬† / If you would like to rank some or all of these research questions, please select a r...-Do other components of fitness vary by genotype, strain? Does transmission frequency vary by strain & genotype, and is this variation modified by resistance? Does such strain-dependent transmissibility vary by setting, i.e., hospitals, prisons, mines?
	E_R_6	Q16_x6	Epidemiology / / ¬† / If you would like to rank some or all of these research questions, please select a r...-What are the consequences for the probability of transmission of multiple infections with different strains different types of drug resistance within a single host?
	E_R_7	Q16_x7	Epidemiology / / ¬† / If you would like to rank some or all of these research questions, please select a r...-Do strain/genotype predict incidence? Drug resistance acquisition/amplification? Transmission? And outcomes?
	E_R_8	Q16_x8	Epidemiology / / ¬† / If you would like to rank some or all of these research questions, please select a r...-Do different resistance patterns (mono, combinations) predict incidence? Drug resistance acquisition/amplification? Transmission? And outcomes?
	E_R_9	Q16_x9	Epidemiology / / ¬† / If you would like to rank some or all of these research questions, please select a r...-Do individual-level demographic, behavioral, clinical characteristics predict incidence? Drug resistance acquisition/amplification? Transmission? And outcomes?
	E_R_10	Q16_x10	Epidemiology / / ¬† / If you would like to rank some or all of these research questions, please select a r...-Do different health-facility characteristics (e.g., access, quality of care, supervision, support) predict incidence? Drug resistance acquisition/amplification? Transmission? And outcomes?
	E_R_11	Q16_x11	Epidemiology / / ¬† / If you would like to rank some or all of these research questions, please select a r...-Does source of transmission (i.e., nosocomia) predict incidence? Drug resistance acquisition/amplification? Transmission? And outcomes?
	E_R_12	Q16_x12	Epidemiology / / ¬† / If you would like to rank some or all of these research questions, please select a r...-What ecologic or population-level characteristics predict resistance incidence, acquisition and/or amplification, transmission, outcomes: regimens; population burden of other diseases (e.g., HIV); degree of public-private mix in TB control; geography or socio-economic status?
	E_R_13	Q16_x13	Epidemiology / / ¬† / If you would like to rank some or all of these research questions, please select a r...-What interventions (e.g., household contact tracing; early, routine DST for all TB cases) are effective at reducing nosocomial infection? What is the impact of these interventions?
Management of Contacts Selection	MC_S_1	Q19_1	Please select your top FIVE (5) research questions from the list below:-How can vaccines be developed to prevent infection?
	MC_S_2	Q19_2	Please select your top FIVE (5) research questions from the list below:-How can we develop a post-exposure vaccine that can prevent active disease in infected contacts?
	MC_S_3	Q19_3	Please select your top FIVE (5) research questions from the list below:-What biomarkers can be used to distinguish infection from disease?
	MC_S_4	Q19_4	Please select your top FIVE (5) research questions from the list below:-Are there biomarkers markers that can identify who, among infected contacts, is most likely to develop active disease?
	MC_S_5	Q19_5	Please select your top FIVE (5) research questions from the list below:-What are the best methods for preventing household transmission?
	MC_S_6	Q19_6	Please select your top FIVE (5) research questions from the list below:-What are best methods to assure HCW implementation of measures known to reduce risk of nosocomial transmission?
	MC_S_7	Q19_7	Please select your top FIVE (5) research questions from the list below:-What are optimal drugs, combinations, and durations for LTBI in known contacts of MDR-TB patients?
	MC_S_8	Q19_8	Please select your top FIVE (5) research questions from the list below:-Should duration and combination be individualized according to risk factors for development of active disease and/or DST of presumed index case?
Management of Contacts Ranking	MC_R_1	Q20_x1	Management of Contacts / / ¬† / If you would like to rank some or all of these research questions, please...-How can vaccines be developed to prevent infection?
	MC_R_2	Q20_x2	Management of Contacts / / ¬† / If you would like to rank some or all of these research questions, please...-How can we develop a post-exposure vaccine that can prevent active disease in infected contacts?
	MC_R_3	Q20_x3	Management of Contacts / / ¬† / If you would like to rank some or all of these research questions, please...-What biomarkers can be used to distinguish infection from disease?
	MC_R_4	Q20_x4	Management of Contacts / / ¬† / If you would like to rank some or all of these research questions, please...-Are there biomarkers markers that can identify who, among infected contacts, is most likely to develop active disease?
	MC_R_5	Q20_x5	Management of Contacts / / ¬† / If you would like to rank some or all of these research questions, please...-What are the best methods for preventing household transmission?
	MC_R_6	Q20_x6	Management of Contacts / / ¬† / If you would like to rank some or all of these research questions, please...-What are best methods to assure HCW implementation of measures known to reduce risk of nosocomial transmission?
	MC_R_7	Q20_x7	Management of Contacts / / ¬† / If you would like to rank some or all of these research questions, please...-What are optimal drugs, combinations, and durations for LTBI in known contacts of MDR-TB patients?
	MC_R_8	Q20_x8	Management of Contacts / / ¬† / If you would like to rank some or all of these research questions, please...-Should duration and combination be individualized according to risk factors for development of active disease and/or DST of presumed index case?
Subcategories: Lab Support	Sub_LS_1	Q23_1	Laboratory Support-Clinical and programmatic value of drug-susceptibility testing
	Sub_LS_2	Q23_2	Laboratory Support-New diagnostics for manifestations other than smear-positive, pulmonary disease in immunocompetent adults
	Sub_LS_3	Q23_3	Laboratory Support-Epidemiological impact of bug and host factors
	Sub_LS_4	Q23_4	Laboratory Support-M. tuberculosis growth and persistence
	Sub_LS_5	Q23_5	Laboratory Support-Biomarkers
Subcategories: Treatment Strategy	Sub_TS_1	Q21_1	Treatment Strategy-Better, Safer Treatment
	Sub_TS_2	Q21_2	Treatment Strategy-Group 5 Drugs
	Sub_TS_3	Q21_3	Treatment Strategy-Standardized, short regimen in settings with prior exposure to second-line drugs
	Sub_TS_4	Q21_4	Treatment Strategy-Toxicity and serious adverse event treatment and management
	Sub_TS_5	Q21_5	Treatment Strategy-Germ and host interaction
	Sub_TS_6	Q21_6	Treatment Strategy-Pharmacokinetics of present second line drugs and drug-drug interactions of second line drugs with ARVs
	Sub_TS_7	Q21_7	Treatment Strategy-Prevention of MDR-TB
Subcategories: Programmatically Relevent Research	Sub_PRR_1	Q22_1	Programmatically Relevent Research-Case finding
	Sub_PRR_2	Q22_2	Programmatically Relevent Research-Treatment delivery
	Sub_PRR_3	Q22_3	Programmatically Relevent Research-Infection control
	Sub_PRR_4	Q22_4	Programmatically Relevent Research-Recording and reporting, use of routine NTP data
	Sub_PRR_5	Q22_5	Programmatically Relevent Research-Implementation and dissemination
	Sub_PRR_6	Q22_6	Programmatically Relevent Research-Coordination
	Sub_PRR_7	Q22_7	Programmatically Relevent Research-Funding and commitment
	Sub_PRR_8	Q22_8	Programmatically Relevent Research-Novel methodologies
	Sub_PRR_9	Q22_9	Programmatically Relevent Research-Health system strengthening
	Sub_PRR_10	Q22_10	Programmatically Relevent Research-Access to MDRTB: diagnosis, delivery and care management
Subcategories: Epidemiology	Sub_E_1	Q25_1	Epidemiology-Burden of DR-TB: Geographic areas
	Sub_E_2	Q25_2	Epidemiology-Burden of DR-TB: Subgroups
	Sub_E_3	Q25_3	Epidemiology-Transmission dynamics of DR-TB
	Sub_E_4	Q25_4	Epidemiology-Multi-level risk factors for DR-TB (with regard to incidence, drug resistance acquisition/amplification, transmission and DR-TB treatment outcomes): Organism
	Sub_E_5	Q25_5	Epidemiology-Multi-level risk factors for DR-TB (with regard to incidence, drug resistance acquisition/amplification, transmission and DR-TB treatment outcomes): Person
	Sub_E_6	Q25_6	Epidemiology-Multi-level risk factors for DR-TB (with regard to incidence, drug resistance acquisition/amplification, transmission and DR-TB treatment outcomes): Health facility/services- program
	Sub_E_7	Q25_7	Epidemiology-Multi-level risk factors for DR-TB (with regard to incidence, drug resistance acquisition/amplification, transmission and DR-TB treatment outcomes): Community/Population Level
	Sub_E_8	Q25_8	Epidemiology-Effectiveness and Impact of Interventions
Subcategories: Management of Contacts	Sub_MC_1	Q24_1	Management of Contacts-Vaccines
	Sub_MC_2	Q24_2	Management of Contacts-Preventing spread from source to contact
	Sub_MC_3	Q24_3	Management of Contacts-Health care training
	Sub_MC_4	Q24_4	Management of Contacts-Treating LTBI

## Sheet: Data
'ID	COMPLETED	LS_S_1	LS_S_2	LS_S_3	LS_S_4	LS_S_5	LS_S_6	LS_S_7	LS_S_8	LS_S_9	LS_S_10	LS_R_1	LS_R_2	LS_R_3	LS_R_4	LS_R_5	LS_R_6	LS_R_7	LS_R_8	LS_R_9	LS_R_10	TS_S_1	TS_S_2	TS_S_3	TS_S_4	TS_S_5	TS_S_6	TS_S_7	TS_R_1	TS_R_2	TS_R_3	TS_R_4	TS_R_5	TS_R_6	TS_R_7	PRR_S_1	PRR_S_2	PRR_S_3	PRR_S_4	PRR_S_5	PRR_S_6	PRR_S_7	PRR_S_8	PRR_S_9	PRR_S_10	PRR_S_11	PRR_S_12	PRR_S_13	PRR_S_14
R_dnfNlnyH9b5kqzP	1		1		1	1					1		2		3	1					4	1		1			1		1		3			2			1						1		1
R_dmURP6LHnXgco5f	1		1			1	1	1			1		1			2	4	5			3	1	1	1			1	1	5	4	3			1	2	1	1	1	1
R_81VPAArrd9iUy2x	1		1	1	1	1				1			3	4	2	1				5			1	1	1		1	1		5	3	4		2	1	1	1									1
R_71Zssol5yQJBNSB	1					1		1	1	1	1					5		3	4	2	1		1	1		1	1	1		5	1		2	3	4		1			1		1	1
R_bQ4h1INRlI2e1tH	1		1		1	1	1	1					2		1	3	4	5				1	1	1	1		1		1	5	2	4		3		1	1							1		1
R_1Zf1HwxHbpmzhXL	1			1					1		1			3					2		1	1		1			1	1	4		3			2	1	1											1	1	1
R_bwGfIPN9uMeiAu1	1				1		1	1	1		1				6		6	6	6		6	1	1	1	1			1	6	6	6	6			6	1				1							1
R_ebrZBHXN6IGrbUx	1		1		1	1			1	1			2		1	4			3	5		1	1		1		1	1	3	5		4		1	2		1		1				1
R_4Ip4eDiIB0poFa5	1	1	1	1	1	1						2	3	4	5	1						1	1	1	1			1	2	5	1	4			3	1	1	1						1		1
R_5dndSWIzuIe8NCd	1				1	1			1	1	1				6	6			6	6	6	1			1	1	1	1	1			2	5	3	4	1	1		1					1
R_8wG3j90sEsUPc2h	1		1	1	1			1			1		2	1	4			3			5	1	1	1	1			1	3	5	2	4			1		1	1						1					1
R_8rf7aPLpKsNAfXL	1	1	1			1	1				1	1	3			5	4				2	1	1	1	1		1		4	5	2	1		3				1	1		1			1
R_aViVwzChgsu1SHb	1	1			1		1	1		1		1			2		1	2		2		1	1	1			1	1	6	6	6			6	6	1	1	1
R_0NcBP90U7yQMDdz	1	1	1	1	1						1	4	1	2	3						5	1	1	1	1			1	1	2	3	5			4		1		1			1
R_8J72C9yNmHQJ2vz	1	1	1	1		1	1					2	1	2		3	3					1		1	1		1	1	1		1	2		2	2		1	1	1				1				1
R_3wPDQRScVQbeRq5	1				1		1	1	1	1					1		4	3	2	5			1		1	1	1	1		1		2	4	3	5				1	1				1			1
R_a62eFSynMK3St5X	1		1	1			1			1	1		3	1			5			2	4			1	1	1	1	1			2	1	4	3	5		1	1	1			1
R_0DtDKHiEkeMQQQt	1		1			1	1			1	1		2			1	1			2	1	1	1	1			1	1	2	2	1			1	1	1	1							1
R_8oY7CUoOBmTmClT	1		1	1	1					1	1		1	2	3					5	4	1		1	1		1	1	1		3	4		5	2			1	1		1				1
R_0N8vmHDAcNwqD65	1	1	1	1		1			1			2	1	3		4			5			1		1	1		1	1	3		1	4		5	2	1	1	1					1	1
R_42ur5VuFjYymc7j	1	1	1	1				1	1			1	1	1				3	2			1	1	1	1			1	1	1	1	2			1	1	1	1	1	1
R_0P3dfh0ZxN2qgcd	1		1		1			1	1		1		6		6			6	6		6		1	1		1	1	1		6	6		6	6	6		1						1			1
R_7QjOBWRALpcfJDn	1	1	1			1	1	1														1	1	1	1			1								1	1	1				1	1
R_ai2JGpQ5FqMcMhD	1	1	1	1	1	1						2	4	1	3	5						1		1	1		1	1	2		1	5		4	3	1	1		1				1			1
R_8kVWnp1rAwUbOjr	1				1	1	1			1	1				2	1	1			3	1	1	1		1		1	1	1	1		3		2	1		1					1	1			1
R_6Lv1JqJvtdz3lQ1	1				1		1	1		1	1				1		4	3		5	2	1	1	1	1			1	1	5	4	2			3		1	1			1					1
R_bvdrGIuE3xkjCdv	1				1	1			1		1				2	3			4		1	1	1		1			1	1	6		6			6			1		1
R_2s2LQ9sjaDeKFsF	1	1	1		1	1				1		2	2		1	6				6		1	1		1	1		1	6	6		1	6		6	1	1					1				1		1
R_2tXeHutjZWgrkBT	1		1	1				1		1	1		4	2				5		3	1	1	1	1			1	1	5	2	3			4	1			1					1	1		1	1
R_cSe0BJVYCFrUiY5	1	1	1	1	1	1						6	6	6	6	6						1		1			1	1	2		1			3	1	1						1	1		1	1
R_6uu4M3bUZdN4NAp	1		1			1			1	1	1		5			4			3	2	1	1		1	1	1		1	5		1	4	3		2	1	1		1						1
R_a5XXsnaXr0fi9ut	1		1		1	1			1		1		5		2	4			3		1	1		1	1		1	1	1		2	3		4	5			1			1							1
R_digNiOUB5LuQnM9	1		1	1		1	1			1			3	2		1	1			2		1		1	1	1		1	2		1	3	2		1			1		1			1				1
R_abo00aO9kfnzLXD	1				1		1	1		1	1				1		3	2		3	1	1	1	1	1		1		1	2	1	1		3				1						1			1
R_3pUWVGBMYjBQVwN	1		1	1	1								3	1	2							1		1	1		1		4		1	2		2		1		1						1	1
R_1FdxLH2ecfJdihT	1	1	1		1		1	1				5	2		1		3	4				1		1	1		1	1	4		3	2		5	1				1				1			1
R_6lnkjdOIJofI94V	1		1					1	1	1	1		1					3	2	4	5	1		1		1	1	1	3		2		6	6	1			1	1	1	1
R_08vfaE8yc4EpaUR	1		1	1	1			1			1		1	4	2			5			3	1	1		1		1	1	2	5		4		3	1	1	1					1				1
R_e8tBvowaYsfbZ8F	1
R_dgpCuIZnW9FXfOR	1	1		1	1			1			1	1		3	2			4			5	1		1	1		1	1	1		2	4		5	3		1								1	1
R_1yRLAmoXKSQRDQp	1	1	1		1		1	1				2	1		3		4	5				1		1		1	1	1	2		1		3	5	4		1	1	1		1							1
R_1H1dmT0IF77s44J	1		1				1		1	1	1		1				1		1	1	1	1	1	1		1		1	1	2	1		1		2		1			1						1
R_bDtW9cNogVmb4G1	1		1	1	1			1	1				3	4	1			2	5			1	1		1		1	1	2	3		4		5	1	1		1					1	1	1
R_bKiVLH99DAjIFZH	1																						1
R_6nTf2kVihKELxWd	1	1	1	1		1		1				1	3	2		4		5				1	1	1			1	1	2	4	1			3	5							1	1	1			1	1
R_5omVxvpVLnQdjeZ	1	1	1	1					1	1		4	5	1					2	3		1	1	1	1			1	1	4	3	2			5		1	1	1					1		1
R_2cqfTzUvqBiaqzj	1	1		1		1		1	1			1		5		2		4	3			1			1	1	1	1	2			5	3	4	1		1		1
R_3R9RhBRNZ1WrK8l	1	1	1		1	1	1					1	5		3	4	2					1		1	1		1	1	2		6	6		6	1	1								1	1
R_81vIiaA2gWioSK9	1			1	1		1	1			1			1	4		2	3			5	1	1		1		1	1	4	2		5		1	3							1					1
R_cu5rcDTAE9J5vcV	1				1	1		1	1	1					1	3		5	2	4		1			1	1	1	1	1			5	2	4	3	1			1			1		1
R_5mOSmhYtB7oKAM5	1	1				1		1	1	1		3				4		5	1	2		1	1	1		1	1		4	1	2		3	5		1	1		1		1
R_07CUvnKj3nxcQdv	1				1		1	1		1	1				1		6	6		6	2		1	1	1		1	1		6	6	6		6	6					1		1					1
R_77Ho7LQlksWPfk9	1	1		1	1			1		1		1		2	4			3		5		1	1	1			1	1	1	3	2			5	4	1	1		1	1						1
R_6yX65t0EweVRuHr	1	1		1		1	1		1			1		4		2	5		3			1		1	1		1	1	5		1	3		2	4	1	1									1	1
R_0uZYS7JNUQQCljD	1		1		1	1	1				1		2		1	1	1				1	1	1		1	1		1	1	1		1	1		1
R_cNHyk32nShp8PK5	1	1	1	1	1	1						3	1	2	4	5						1			1	1	1	1	1			6	6	2	6				1	1			1				1
R_6X61p7JqLDAlzJX	1	1	1	1				1	1													1		1	1		1	1								1		1	1		1			1
R_dh9O6z4cgj5KamF	1				1	1			1	1	1				2	3			5	1	4	1	1	1	1		1		2	1	4	3		5				1				1		1		1		1
R_0w7pqTV02e0gRRX	1		1	1	1		1			1			1	3	4		2			5		1	1	1	1		1		3	2	1	4		5			1						1		1	1
R_7R4cBXWOpu3IKcR	1		1		1	1			1		1		5		1	2			3		4	1		1	1		1	1	1		4	2		5	3						1		1			1	1
R_1HXKqela4n8rDEh	1		1	1			1	1	1				2	1			3	4	5				1	1			1			2	1			3		1	1		1
R_bOOEPzdFDaRoq8Z	1	1
R_eqHb4JkId4xvvfL	1		1	1	1		1				1		1	5	3		2				4	1		1	1		1	1	6		1	6		6	6	1									1			1
R_5uMYe4OTBqduWR7	1	1	1	1		1			1			3	1	1		2			2			1			1	1	1	1	1			1	3	2	2			1				1		1				1
R_4IOHKdI7ITuMWhv	1	1	1		1	1			1			1	3		2	4			5			1		1	1		1	1	3		1	4		5	2	1	1					1	1			1
R_dgtTghfYxImOHkh	1		1		1		1			1	1		2		1		5			4	3	1	1	1	1			1	3	5	2	4			1	1						1				1
R_2oxNdjDMkx5AMOV	1	1			1	1	1				1	2			1	6	6				6	1		1	1		1	1	2		1	3		5	4	1	1										1
R_0OOlIhwswZETkMd	0		1	1	1	1	1						6	3	2	6	1							1	1	1	1	1			2							1	1
R_9EN01gxDlNK4I8B	1
R_bd3ZKcWBMGF0PeB	1				1	1	1	1			1				2	6	3	6			1	1	1		1	1		1	6	2		1	3		6									1		1	1
R_d1oLqjcrQwhG7Ep	1	1	1		1	1					1	1	2		1	3					4	1		1		1	1	1	2		1		3	4	1		1							1	1		1
R_cShzcvcupjDWvK5	1	1	1			1	1	1				2	1			2	1	2				1	1	1			1	1	2	2	1			1	2	1	1	1								1
R_7331GbaY89andtz	0
R_9TQuqFfephZLgPj	0
R_23NDuStmQ7PgkkJ	0
R_6J61hJ5W6hMarrv	0
R_3rt6mm3Tiz5HZYh	0	1	1	1	1				1			2	3	4	1				5			1	1	1	1			1	3	4	1	5			2				1	1		1
R_4OclVT9yjBVCBxj	0
R_8HpDR3PnKltNu8l	0
R_1N71PKzC7H2tL7v	0
R_3DC0xjjfuj1NFXf	1		1			1	1		1	1			1			2	4		3	5				1			1	1			1			3	2		1						1	1
R_4UZfPLXa1duGas5	0
R_djxLoYex3Z7ek4Z	0			1	1			1	1		1			4	2			3	1		5	1	1	1		1		1	3	5	4		2		1
R_3OfMLKHcNyI6CoJ	0
R_80xUwW2N0AI2Qf3	1
R_5hDB5CnAi6w6hq5	0
R_8Cdrm6CZDro3sTr	0
R_bem4LzBN3DZ06EJ	0
R_d7rv2cioVTUrd7T	0
R_8qXxWBQ4cbguxJb	0
R_80lyNGrzUef3T2R	0
R_9yTcb7ITjZ75bW5	0	1	1	1		1					1	1	1	1		2					3	1	1	1	1			1
R_6R98HMEqN5l8Cwt	0
R_em4gblFOFKHbaFT	0
R_0UMJQcEDzLYJ0Tr	0
R_5yH1tABidFVz7Pn	1	1	1		1				1		1	6	1		2				6		6	1	1	1	1		1		6	6	6	6		6		1			1						1		1
R_8Glpf6P2BW4bxnD	0
R_bJmdtzvo0DERNL7	1		1				1	1		1	1		1				4	5		3	2			1	1	1	1	1			2	3	5	4	1	1	1									1	1
R_brupyfswAE9cNOl	1	1		1	1	1	1					3		1	2	4	5					1	1	1	1			1	1	4	2	1			2	1		1	1						1	1
R_516a1AfCmraplVb	0
R_3QUawOFPiksZG0B	1				1	1	1	1		1					1	3	2	4		5		1		1	1		1	1	2		3	4		5	1		1	1							1		1
R_7NwS70cBBxNvNjf	0
R_6ssiiCOkTB6DaYJ	0	1	1		1	1		1				2	3		1	5		4
R_eqxpdHJqgi3OTg9	0
R_2h5q4VLsOkCVJbL	1		1	1	1				1	1			1	3	5				2	4		1		1	1	1		1	3		5	4	2		1		1		1	1	1
R_51JMBg8lkHvcCod	1		1	1			1			1			1	2			4			3		1		1	1			1	6		1	2			6	1		1					1	1
R_0jMDqcc8Ncon2PX	1		1	1	1					1	1		4	1	5					3	2	1		1	1			1	1		3	4			2			1	1						1			1	1
R_cAMILYiuDHiRDMh	1				1	1	1	1			1				5	2	1	4			3	1	1	1	1			1	3	4	1	5			2		1						1			1		1
R_5B9hnozpRaE7AAl	1	1	1	1							1	4	3	1							2	1	1	1			1	1	1	5	2			3	4			1	1	1	1
R_eURJpJB5ztHkG3j	1			1	1				1	1	1			1	2				3	3	1	1		1	1		1	1	1		2	1		2	3		1	1				1				1
R_8ctZlOWcz1nWYwR	1	1	1		1				1	1		4	1		2				5	3		1	1	1		1		1	3	4	5		2		1	1			1			1
R_ePOdrD3f0AnmCAl	1	1			1	1			1		1											1	1	1	1			1									1		1				1				1
R_daMuqouv7GJBjBX	1		1		1			1	1		1											1		1	1			1	3		4	2			1		1			1			1			1	1
R_2uuUnrIP84HiO57	0
R_eeOVGSmi7YaOwCx	0		1		1		1	1	1				1		2		1	2	3			1	1		1		1	1	4	1		4		3	2							1			1	1
R_8xgqSF4kVvkVzQF	1		1	1	1			1			1		2	3	4			1			5	1		1	1		1	1	2		1	4		5	3		1	1						1
R_0dKlpbrdipoftAh	0			1			1	1		1	1			3			5	2		4	1	1		1	1		1	1	1		4	3		5	2
R_25oMDopy3caW5ZX	0
R_4VkDnorrooobOjr	0
R_0J3hsbdoI73jAfX	0		1	1					1		1		2	1					3		4	1		1	1		1	1	1		2	3		4	5
R_37BhcwJnGF0HJkh	1	1		1		1			1			3		2		1			4			1	1	1			1		3	2	1			4						1		1				1
R_0iFb0cyFz5a6vU9	1	1	1	1	1	1						1	2	3	4	5						1		1	1		1	1	1		2	3		4	5		1	1	1			1	1
R_7UtiGWgKHPNfmIJ	0
R_bej9jgQvt1uAKxf	1	1			1	1		1		1		2			1	3		4		5		1		1	1	1		1	2		1	5	4		3	1	1	1									1	1
R_b3JyR7N0ggt2rNr	0
R_7WhJmlFbkJpmAsd	1	1	1	1	1				1			4	1	3	5				2			1	1	1			1	1	3	5	2			4	1				1					1				1	1
R_9WCjHdIVIwRKZ7v	0
R_1yNjqQBWc816z2Z	0
R_5bil9guaAzkFMEt	1	1	1	1	1	1						1	3	2	4	5						1	1	1	1			1	2	3	1	4			5	1	1	1	1		1
R_0H3QAKNJcMMi0tL	1	1	1		1			1			1	4	1		2			5			3	1		1	1		1	1	1		4	3		2	5				1	1						1		1
R_ac6f1KlxQZKTPCt	1	1	1	1		1		1				1	3	5		4		2				1	1		1	1		1	1	4		3	5		2	1		1						1	1
R_3e2PhwZzEyfQv4x	1	1	1	1	1	1						1	1	1	2	3						1	1	1	1			1	1	2	3	1			1			1										1	1
R_1zuA8MpO0C347E9	0	1	1	1	1
R_1AIll47mDaae5md	1	1	1	1	1	1						1	3	1	4	2						1		1				1	1		1				2		1	1				1	1			1
R_7VZiNtGIfiRUifH	1	1	1	1	1	1						2	1	1	1	2						1		1	1		1	1	1		1	1		2	1	1	1	1	1				1
R_b19PlQy4lLq6hBr	1		1		1		1	1			1		2		1		3	4			5	1		1	1		1	1	5		1	3		4	2		1							1		1	1
R_2tOhYRq48s12cip	1	1		1	1				1		1	3		2	4				1		5	1	1		1		1	1	3	4		2		5	1	1		1		1			1
R_aWbCDpEBib9ISmF	0
R_eA67MzFrMQWvlOd	0
R_5uQlD8YQDSjsB5b	0
R_6YBr4BmVz11BJPf	0
R_ePcHrkFVba6h1u5	1	1	1		1	1	1					1	2		5	3	4						1	1	1	1		1		1	2	5	3		4	1		1	1		1
R_55XdxSxPCpnVFZP	1	1	1	1		1				1		2	1	2		1				3		1		1	1		1	1	1		1	3		2	1	1	1		1
R_23T1ARPSZ4Je18h	0
R_1Aoafh036QmJBgV	0
R_5o46B7sLZGvxieh	0
R_6mpEKeMcp5QjWAZ	1		1		1	1		1			1		1		2	3		4			5		1		1	1	1	1		4		3	5	2	1							1		1		1
R_ezJVSQzG8uAX69T	0	1	1					1		1	1	2	1					3		5	4		1		1	1	1	1		5		2	1	4	3	1		1	1			1
R_eA5tI8PcMKW7wVL	0
R_2bnc6TwBdS0MGB7	0		1		1			1			1
R_6RsaI8E2Q1xHXaR	0
R_cAqPXIIL3Decl81	0
R_eJRMkTH14GKOcXr	0	1	1	1			1			1		1	2	3			1			1
R_2rhDM8hFd78Zhe5	1		1	1	1			1	1				1	3	4			5	2			1	1		1		1	1	4	1		2		3	5		1	1		1				1
R_bqPBS9BHwdZpDeZ	1			1	1	1			1	1				2	4	5			1	3		1		1	1		1	1	3		1	5		4	2									1	1	1	1
R_4UepvT2Q8fYhQVL	1			1		1			1	1	1			5		3			4	2	1	1		1	1		1	1	2		1	2		6	1		1							1		1	1
R_3WMueY0sBLMwY7z	0			1	1		1	1			1			5	3		2	4			1	1	1	1			1	1	5	4	1			2	3
R_4OYK8A6uQ77A4jb	1	1		1	1	1	1					2		1	3	1	3					1		1	1		1	1	2		1	1		1	1	1	1							1		1	1
R_diICmp53dPNyvu5	1		1		1		1	1	1				1		5		2	4	3			1		1	1		1	1	3		2	4		5	1		1		1			1							1
R_4MKjni4NI2arR1b	1	1	1	1		1		1				3	1	2		4		5				1		1	1		1	1	5		2	4		3	1	1	1						1					1
R_1Y2vf4LTJ9WBvHD	1		1	1	1			1	1				2	1	3			4	5			1	1			1	1	1	1	2			3	5	4		1	1	1		1				1
R_6WpZn5hdcNWoPS5	1	1	1	1	1						1	3	2	1	4						5	1	1	1	1			1	1	5	2	4			3		1		1				1
R_02rfzy1CqWpqXxX	0
R_cOpInKCdDFFZzo1	1			1	1			1	1		1			6	6			6	6		6	1		1	1	1		1	3		5	2	4		1		1	1				1		1
R_4N4rP1kMbPcVRZP	1	1	1	1		1				1		1	4	2		3				5		1		1		1	1	1	1		3		5	4	2			1	1										1
R_af5Zb2VjLCk8WQB	1		1	1	1		1				1		1	5	2		3				4	1	1	1			1	1	1	4	2			5	3		1	1						1	1				1
R_cHKhXOT7jI14qRT	0
R_7UqO6U1ggR0COxL	0
R_3DYNqKGeatF7uXH	0
R_eWXZPUmIWzdQbzL	1	1			1	1	1	1				6			6	6	6	6				1		1	1		1	1	6		6	6		6	6		1									1		1
R_5vRjnsAXDclTMcB	1	1	1	1	1		1					1	1	1	2		1					1		1	1	1	1		2		1	1	1	2		1	1	1	1		1
R_eksLgyyq6YhyjR3	1	1	1		1		1				1	3	2		4		5				1			1	1	1	1	1			5	4	1	2	3	1	1		1						1
R_00QJeiAjeBga9Nj	1		1	1	1				1	1			4	5	3				5	4		1	1		1	1		1	5	4		5	4		5	1	1	1	1	1
R_3JCCb2XSMmu4XWJ	1	1		1		1		1		1		1		2		5		4		3		1	1	1	1		1		3	5	1	2		4		1	1	1				1	1
R_0f6ZbvAlQZcTvQF	0
R_dfZa9QhWtlnQQ7P	0
R_77nT8Z6VZsyhBvT	0
R_1Ch5HLfJvYqoaTb	0
R_787d4bl9el47Tk9	0
R_0SRNeh3KrIRTWGV	0				1	1	1			1	1				4	1	2			3	6		1	1	1		1	1		4	5	1		2	3
R_4Ucz1Zcvt5jEtYp	0
R_1ELZpHslmzmtFuB	0
R_5u3YJUsnArfQWIB	0
R_3qmL81mu0tyu0aF	0	1	1									6	6
R_72Rp8bkI4s8ue7H	0	1	1		1	1		1				4	2		5	1		3				1		1	1		1	1	1		2	5		3	4		1		1			1		1
R_3yCvCuKx1b8Zqbr	0			1	1	1			1	1				2	1	5			4	3
R_0MJIcvW6p2ITR9r	0
R_7U1DBn3fOzntDi5	0		1																			1						1										1										1	1
[truncated: 98 more columns]
